# Supplementary material for: First-year students’ math anxiety predicts STEM avoidance and underperformance throughout university, independently of math ability
Source: PubMed Central journal article supplement (PMC8203776; doi:10.1038/s41539-021-00095-7), 2021-06-14
Supplement: 41539_2021_95_MOESM1_ESM.pdf [file 41539_2021_95_MOESM1_ESM.pdf]

## Supplementary Information

**Supplementary Table 1**

| Department Name                      | STEM | Department Name                       | STEM |
|--------------------------------------|------|---------------------------------------|------|
| Actuarial Science                    | 1    | History                               | 0    |
| American Studies                     | 0    | Interdisciplinary Studies             | 0    |
| Anthropology                         | 0    | Italian                               | 0    |
| Applied Mathematics                  | 1    | Japanese                              | 0    |
| Arts and Humanities                  | 0    | Kinesiology                           | 0    |
| Astronomy                            | 1    | Mathematics                           | 1    |
| Biology                              | 1    | Medieval Studies                      | 0    |
| Business Administration              | 0    | Media, Information and Technoculture  | 0    |
| Calculus                             | 1    | Management and Organizational Studies | 0    |
| Centre for Global Studies            | 0    | Music                                 | 0    |
| Chemistry                            | 1    | Philosophy                            | 0    |
| Chinese                              | 0    | Physics                               | 1    |
| Classical Studies                    | 0    | Physiology                            | 1    |
| Comparative Literature and Culture   | 0    | Political Science                     | 0    |
| Computer Science                     | 1    | Portuguese                            | 0    |
| Digital Humanities                   | 0    | Psychology                            | 0    |
| Dimensions of Leadership             | 0    | Religious Studies                     | 0    |
| Earth Sciences                       | 1    | Russian                               | 0    |
| Economics                            | 0    | Scholars Electives                    | 0    |
| English                              | 0    | Sociology                             | 0    |
| Engineering Science                  | 1    | Social Justices and Peace Studies     | 0    |
| Environmental Science                | 1    | Social Work                           | 0    |
| Family Studies and Human Development | 0    | Spanish                               | 0    |
| Film Studies                         | 0    | Speech                                | 0    |
| Financial Modeling                   | 1    | Statistical Sciences                  | 1    |
| Foods and Nutrition                  | 0    | Visual Arts History                   | 0    |
| French                               | 0    | Visual Arts Studio                    | 0    |
| Geography                            | 0    | Women's Studies                       | 0    |
| German                               | 0    | Writing                               | 0    |
| Health Sciences                      | 0    |                                       |      |

Note: The list of academic departments in which participating students took courses. Each department was classified as either STEM (1) or non-STEM (0). For details on this classification, see the Methods section.

**Supplementary Table 2**

| Measure               | Mean (SE)    | % STEM Courses |             |              |              |               | Verbal Working Memory |        | non-STEM Grades |  |
|-----------------------|--------------|----------------|-------------|--------------|--------------|---------------|-----------------------|--------|-----------------|--|
|                       |              | STEM Courses   | STEM Grades | Math Anxiety | Math Ability | Trait Anxiety | Gender                | Gender | Grades          |  |
| % STEM Courses        | .48 (.02)    | -              |             |              |              |               |                       |        |                 |  |
| STEM Grades           | 77.81 (.79)  | .12            | -           |              |              |               |                       |        |                 |  |
| Math Anxiety          | 30.62 (1.52) | -.39***        | -.32***     | -            |              |               |                       |        |                 |  |
| Math Ability          | 51.1 (1.82)  | .24***         | .28***      | -.35***      | -            |               |                       |        |                 |  |
| Trait Anxiety         | 40.84 (.79)  | -.13           | -.10        | .43***       | .03          | -             |                       |        |                 |  |
| Verbal Working Memory | 46.27 (1.16) | .01            | .06         | -.07         | .17*         | -.07          | -                     |        |                 |  |
| Gender                | .64 (.04)    | -.08           | -.04        | .37***       | -.13         | .32***        | -.09                  | -      |                 |  |
| non-STEM Grades       | 79.16 (.66)  | .34***         | .71***      | -.29***      | .22**        | -.20**        | .02                   | -.02   | -               |  |
| Semesters Absent      | .51 (.08)    | .33***         | -.18*       | -.05         | -.08         | -.02          | -.05                  | .08    | -.08            |  |

Note: Descriptive statistics and zero-order correlations for all variables are shown.  $N = 183$ . \*  $p \leq .05$ , \*\*  $p \leq .01$ , \*\*\*  $p \leq .001$

**Supplementary Table 3**

| DV: % STEM Courses             | B     | SE   | t     | p    | d     |
|--------------------------------|-------|------|-------|------|-------|
| Math Anxiety                   | -.111 | .027 | -4.17 | 5E-5 | -.635 |
| Non-STEM Grades                | .044  | .023 | 1.93  | .055 | .293  |
| Math Ability                   | -.100 | .031 | -3.26 | .001 | -.495 |
| STEM Grades                    | .028  | .024 | 1.17  | .245 | .177  |
| Trait Anxiety                  | -.005 | .021 | -.24  | .807 | -.037 |
| Verbal Working Memory          | .001  | .047 | .02   | .988 | .002  |
| Gender                         | .160  | .030 | 5.31  | 3E-7 | .808  |
| Semesters Absent               | .103  | .021 | 4.95  | 2E-6 | .753  |
| Math Anxiety x non-STEM Grades | -.008 | .021 | -4.40 | .000 | -.061 |

Note: All predictors are standardized and % STEM Courses is in its native units. The B estimate can therefore be interpreted as the change in % STEM Courses associated with a one standard deviation of the predictor.  $d$  refers to Cohen's  $d$  measure of effect size.  $df = 173$ . Adjusted  $R^2 = .343$ .

### Supplementary Table 4

| DV: STEM Grades                | B      | SE    | t     | p       | d     |
|--------------------------------|--------|-------|-------|---------|-------|
| Math Anxiety                   | -2.743 | .692  | -3.96 | 1E-4    | -.603 |
| Non-STEM Grades                | .984   | .590  | 1.67  | .097    | .253  |
| Math Ability                   | -2.080 | .639  | -3.26 | .001    | -.495 |
| % STEM Courses                 | 1.374  | .618  | 2.22  | .028    | .338  |
| Trait Anxiety                  | .064   | .534  | .12   | .905    | .018  |
| Verbal Working Memory          | .440   | 1.207 | .36   | .716    | .055  |
| Gender                         | 7.817  | .593  | 13.19 | < 2E-16 | 2.00  |
| Semesters Absent               | -.630  | .573  | -1.10 | .273    | -.167 |
| Math Anxiety x non-STEM Grades | -1.503 | .519  | -2.90 | .004    | -.441 |

Note: All predictors are standardized and STEM Grades is in its native units. The B estimate can therefore be interpreted as the change in STEM Grades associated with a one standard deviation of the predictor. *d* refers to Cohen's *d* measure of effect size. *df* = 173. Adjusted  $R^2$  = .571.

### Supplementary Table 5

| DV: % STEM Courses    | B     | SE   | t     | p    | d     |
|-----------------------|-------|------|-------|------|-------|
| Math Anxiety          | -.188 | .051 | -3.67 | 3E-4 | -.558 |
| Math Ability          | .046  | .023 | 2.02  | .045 | .307  |
| STEM Grades           | -.103 | .030 | -3.46 | .001 | -.527 |
| Trait Anxiety         | .031  | .024 | 1.31  | .192 | .199  |
| Verbal Working Memory | -.011 | .021 | -.55  | .582 | -.084 |
| Gender                | .030  | .049 | .62   | .535 | .095  |
| non-STEM Grades       | .162  | .029 | 5.58  | 9E-8 | .849  |
| Semesters Absent      | .108  | .021 | 5.19  | 6E-7 | .789  |
| Math Anxiety x Gender | .099  | .055 | 1.79  | .075 | .272  |

Note: All predictors are standardized and % STEM Courses is in its native units. The B estimate can therefore be interpreted as the change in % STEM Courses associated with a one standard deviation of the predictor. *d* refers to Cohen's *d* measure of effect size. *df* = 173. Adjusted  $R^2$  = .355.

**Supplementary Table 6**

| <b>DV: STEM Grades</b> | <b>B</b> | <b>SE</b> | <b>t</b> | <b>p</b> | <b>d</b> |
|------------------------|----------|-----------|----------|----------|----------|
| Math Anxiety           | -4.71    | 1.361     | -3.46    | 6E-4     | -.527    |
| Math Ability           | .988     | .598      | 1.65     | .100     | .251     |
| % STEM Courses         | -2.25    | .650      | -3.46    | .001     | -.527    |
| Trait Anxiety          | 1.206    | .621      | 1.94     | .054     | .295     |
| Verbal Working Memory  | .023     | .549      | .04      | .967     | .006     |
| Gender                 | 1.457    | 1.290     | 1.13     | .260     | .172     |
| non-STEM Grades        | 7.640    | .595      | 12.83    | < 2E-16  | 1.951    |
| Semesters Absent       | -.430    | .589      | -.73     | .466     | -.111    |
| Math Anxiety x Gender  | 2.856    | 1.452     | 1.97     | .051     | .299     |

Note: All predictors are standardized and STEM Grades is in its native units. The B estimate can therefore be interpreted as the change in STEM Grades associated with a one standard deviation of the predictor. *d* refers to Cohen's *d* measure of effect size.  $df = 173$ . Adjusted  $R^2 = .561$ .
